# Supplementary material for: A novel model for simulation of nitrate in aquifers
Source: Copernicus journal article supplement (doi:10.5194/hess-2018-222), 2018-05-23
Supplement: Supplementary file 1 [file hess-2018-222-supplement.pdf]

**Supplementary Information for:**  
**A novel model for simulation of nitrate in aquifers**

Roohollah Noori<sup>1\*</sup>, Mehrnaz Dodangeh<sup>1</sup>, Ronny Berndtsson<sup>2</sup>, Farhad Hooshyaripor<sup>3</sup>, Jan  
Franklin Adamowski<sup>4</sup>, Saman Javadi<sup>5</sup>, Akbar Baghvand<sup>1</sup>

<sup>1</sup>Department of Environmental Engineering, Graduate Faculty of Environment, University of  
Tehran, Iran

<sup>2</sup>Department of Water Resources Engineering & Center for Middle Eastern Studies, Lund  
University, Box 118, SE-221 00 Lund, Sweden

<sup>3</sup>Department of Civil Engineering, Science and Research Branch, Islamic Azad University,  
Tehran, Iran

<sup>4</sup>Department of Bioresource Engineering, Faculty of Agricultural and Environmental Sciences,  
McGill University, Canada

<sup>5</sup>Department of Irrigation and Drainage, Aburaihan Campus, University of Tehran, Iran

\*Correspondence: Roohollah Noori

Department of Environmental Engineering, Graduate Faculty of Environment,  
University of Tehran,

Enqelab Avenue, Qods Street, Azin Alley, P.O. Box: 14155-6135, Tehran, Iran

Tel: +982161113584; Fax: +982166407719

E-mail: [noon@ut.ac.ir](mailto:noon@ut.ac.ir)

ORCID: <http://orcid.org/0000-0002-7463-8563>

## **SI Figure Captions**

**Figure S1.** Location of 12 observation wells (piezometers), land use map, production wells used for industrial and agricultural activities, and groundwater table in the Karaj Aquifer for April 2011 (the two red lines indicate boundary conditions containing given heads)

**Figure S2.** Thickness of the Karaj Aquifer

**Figure. S3.** Spatial variation of calibrated hydraulic conductivity in the Karaj Aquifer

**Figure S4.** Spatial variation of recharge in the Karaj Aquifer

**Figure S5.** Spatial variation of calibrated specific yields in the Karaj Aquifer

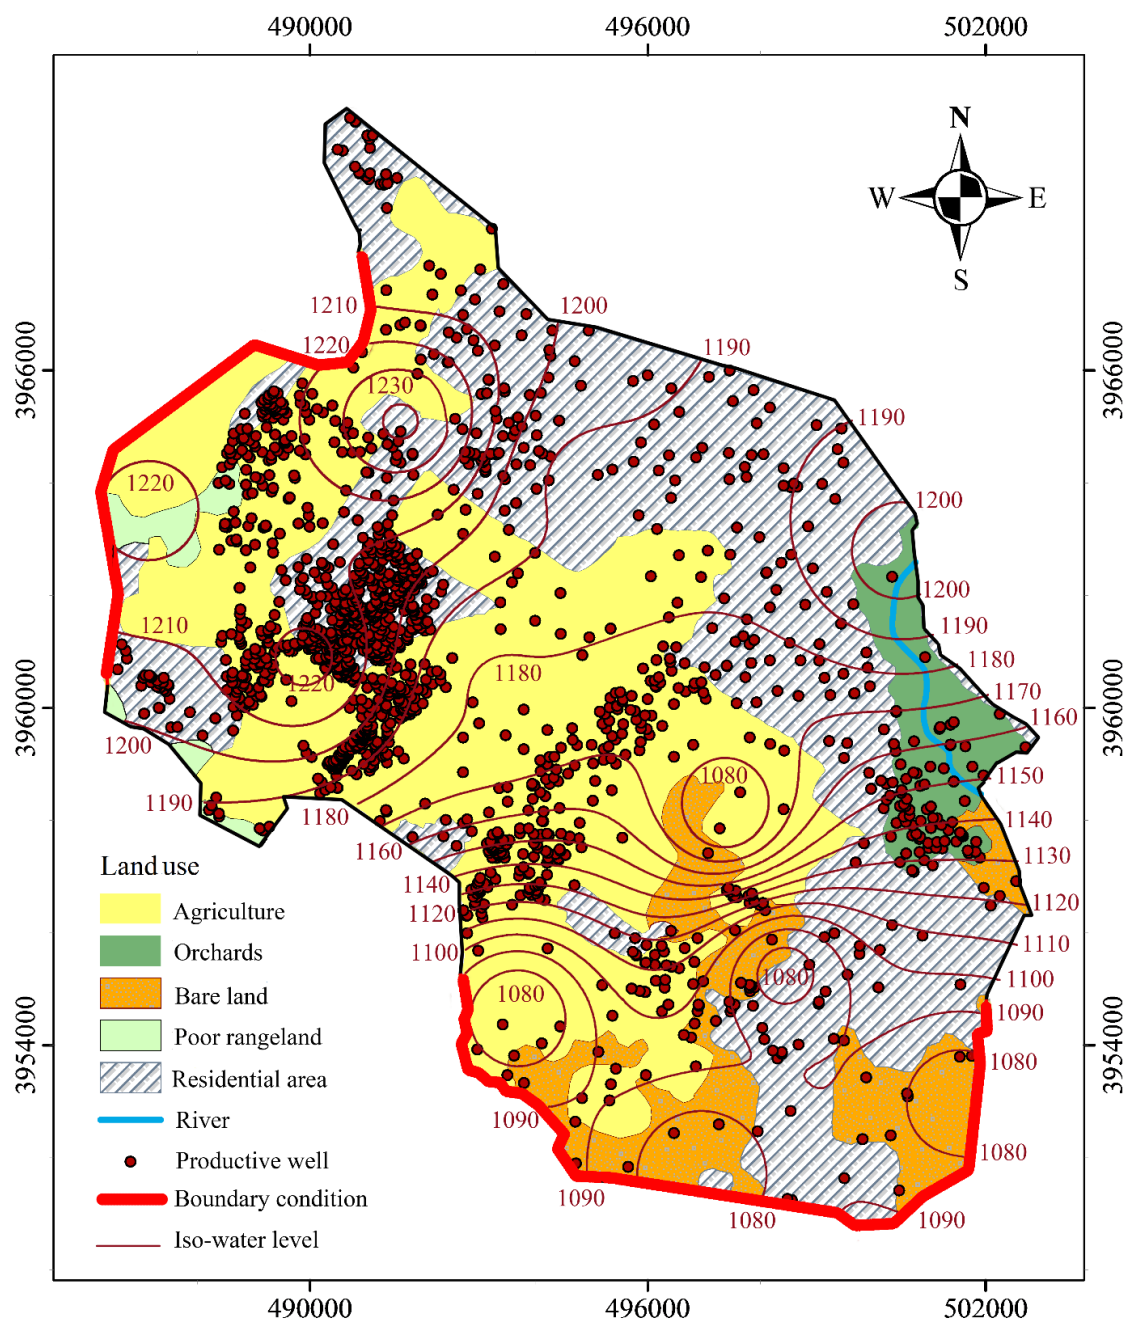

Figure S1

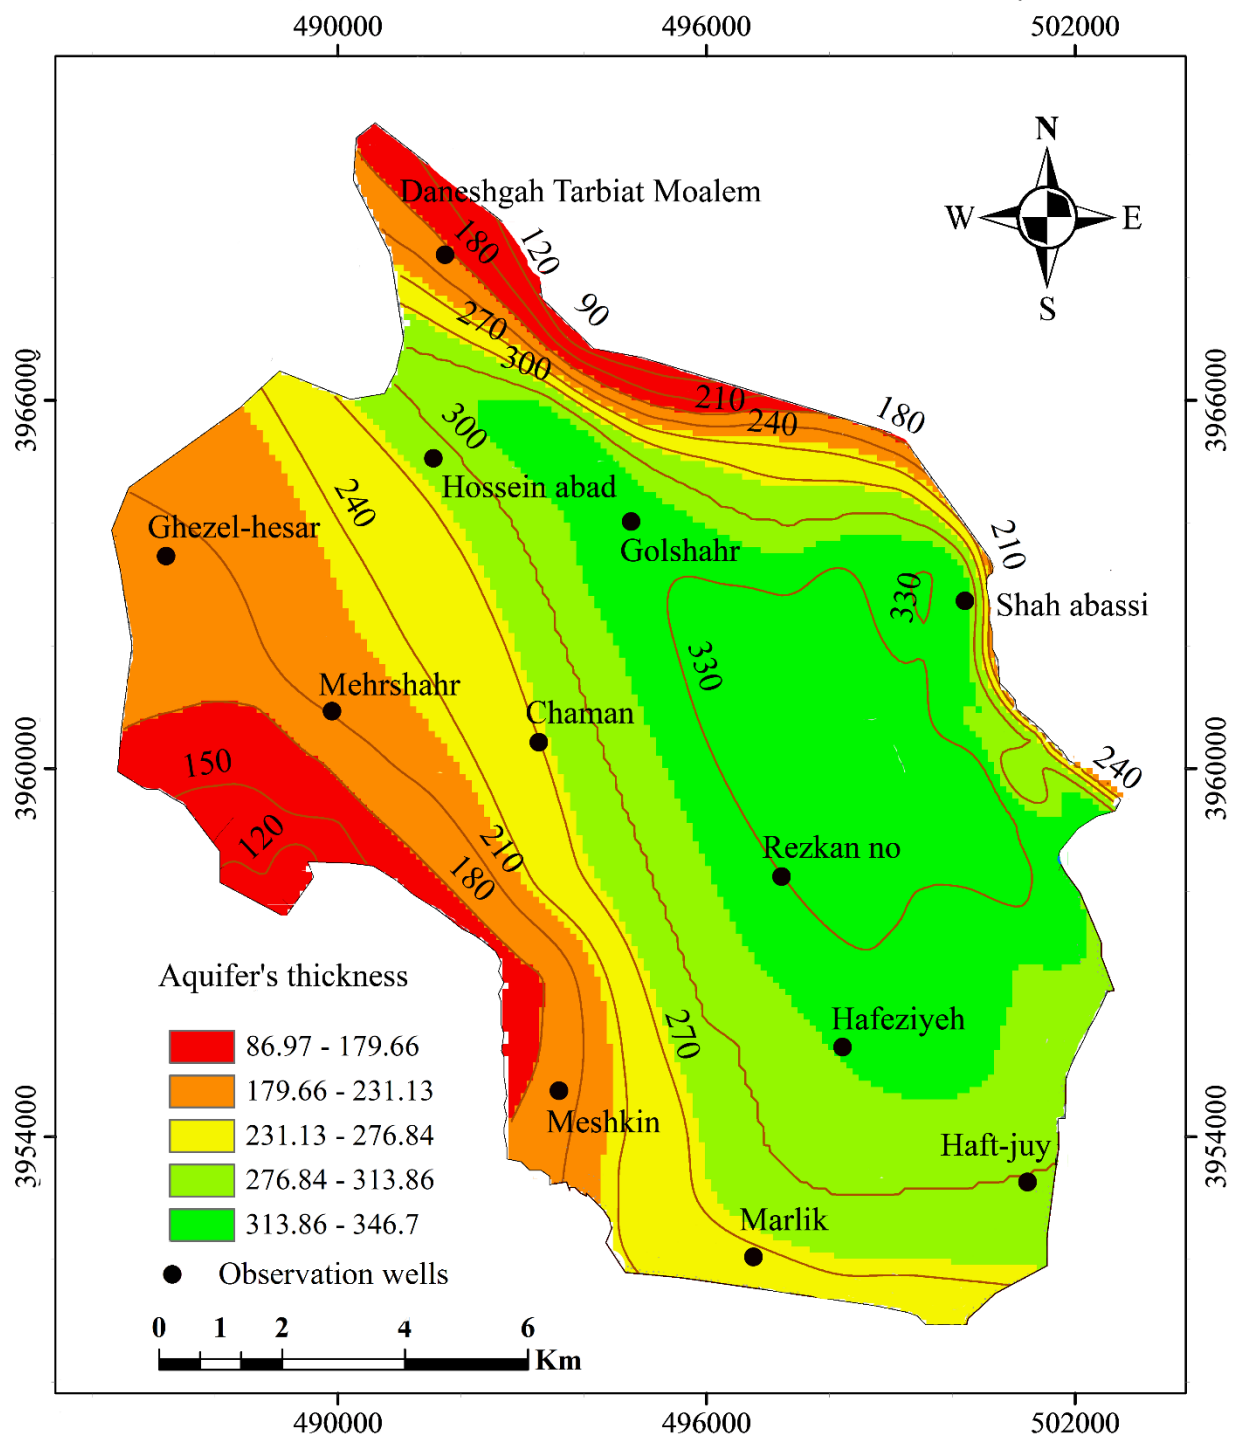

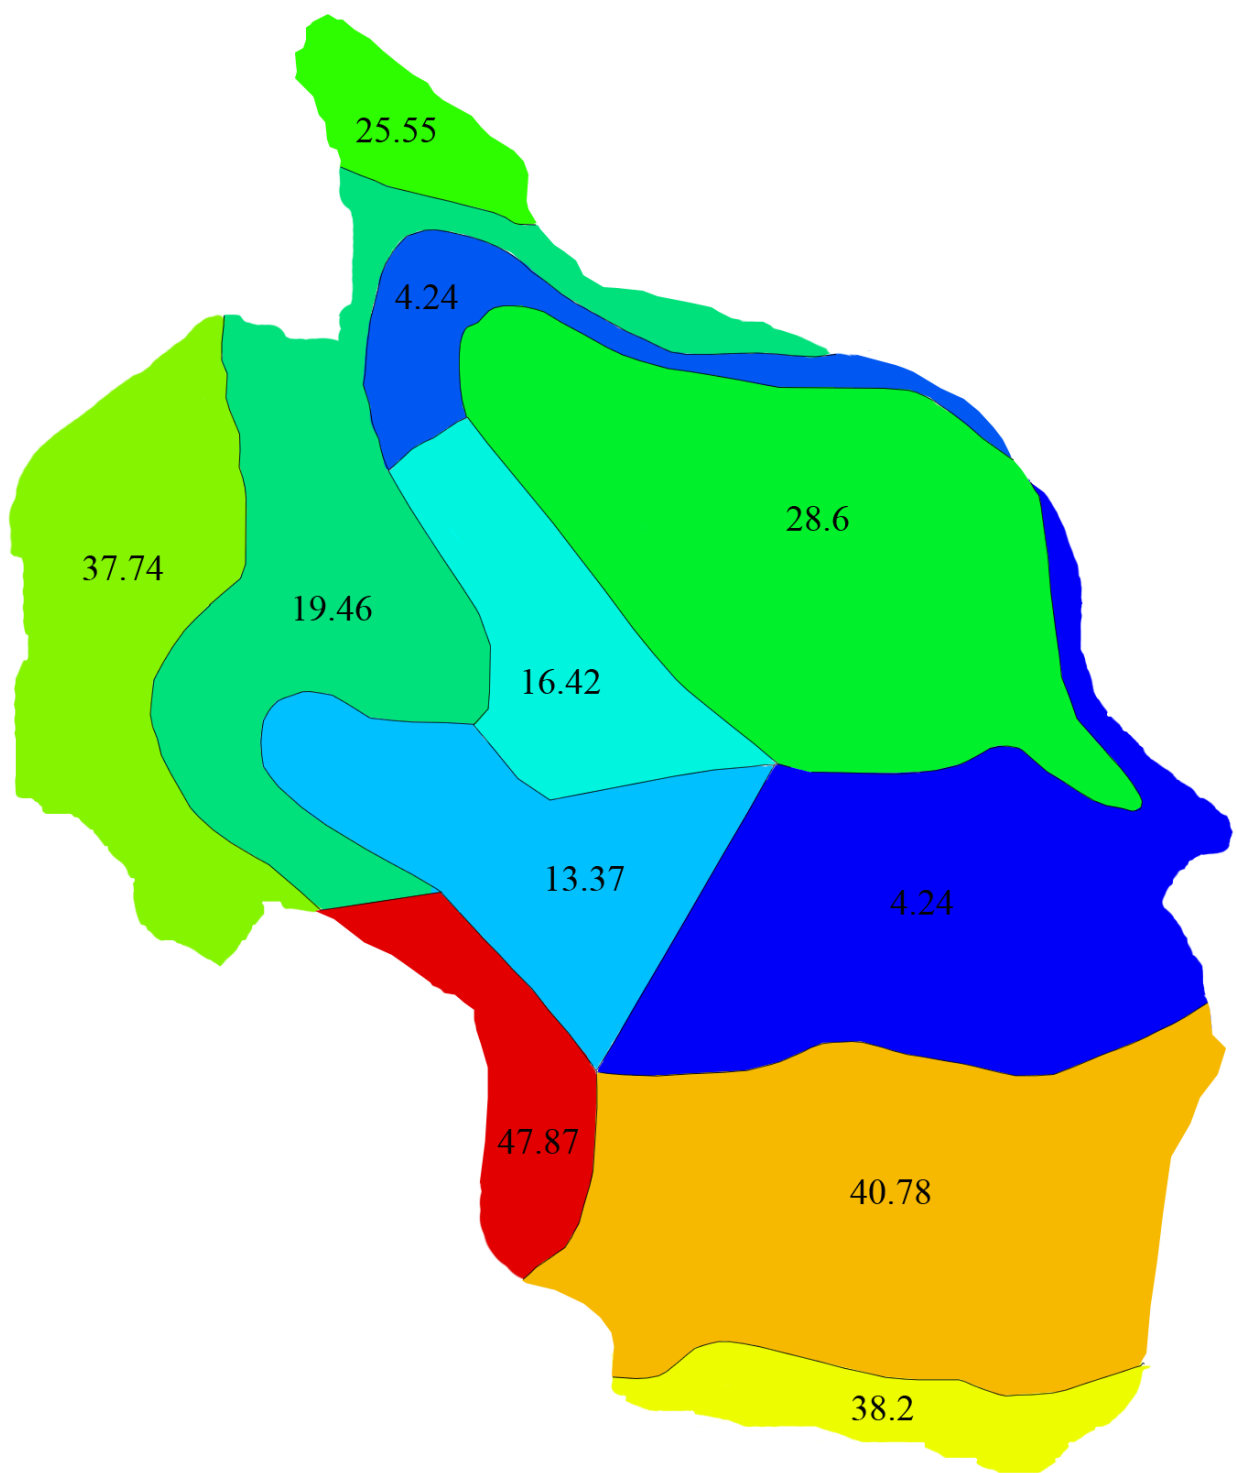

**Figure S3**

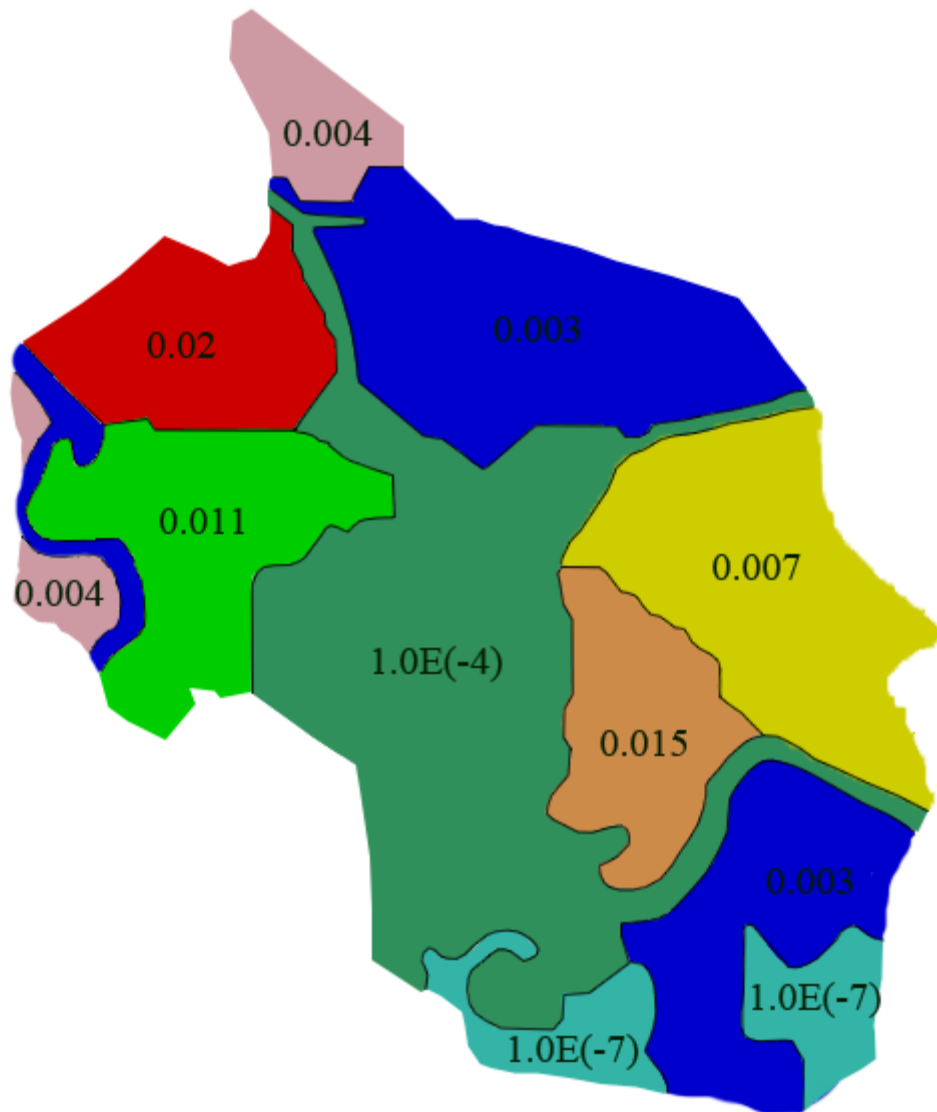

Figure S4

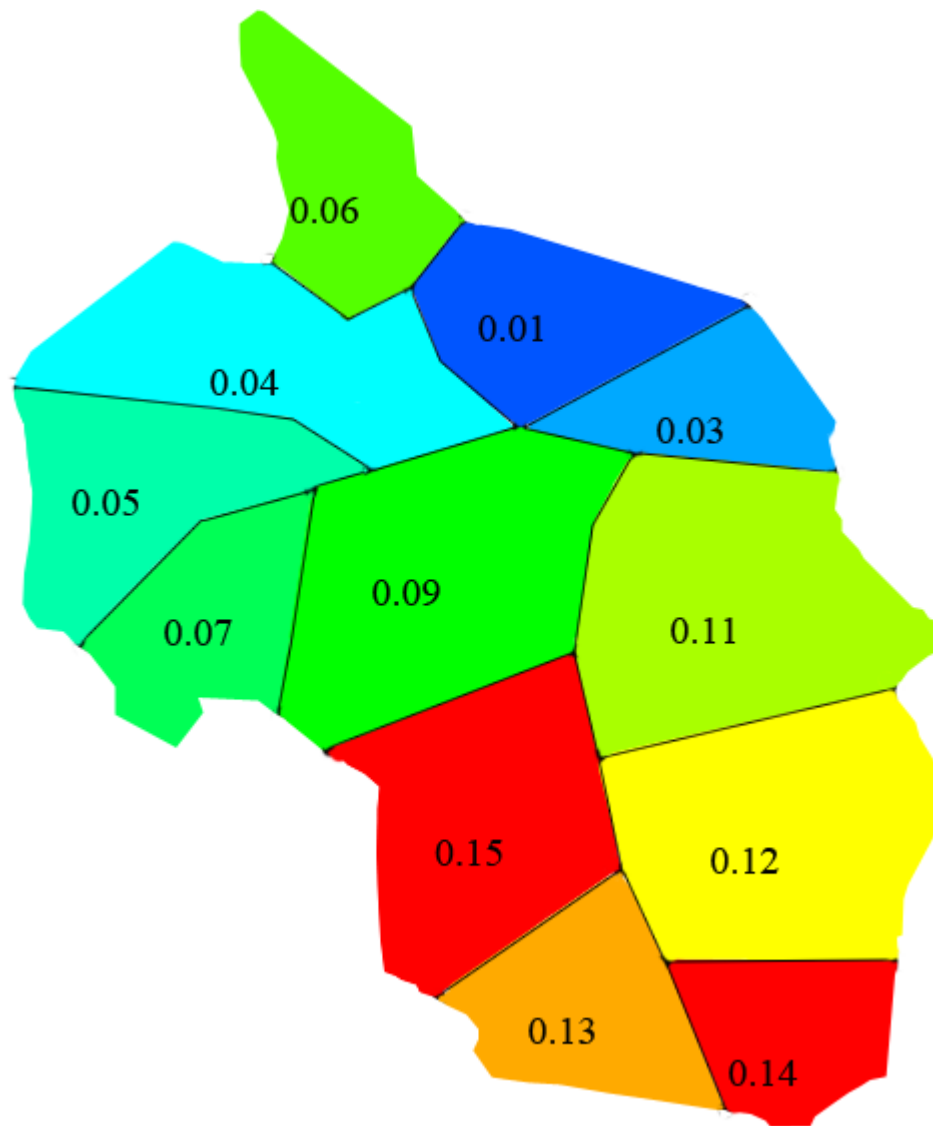

Figure S5
